# Supplementary material for: Synthesis and optical properties of a new triphenylamine-p-phenylenevinylene-small molecule with applications in high open-circuit voltage organic solar cells
Source: Royal Society of Chemistry journal article supplement (doi:10.1039/c5nj01525a), 2015-01-01
Supplement: c5nj01525a1.pdf [file c5nj01525a1.pdf]

## New Journal of Chemistry

### Electronic Supplementary Information (ESI)

# Synthesis and optical properties of a new triphenylamine-*p*-phenylenevinylene-small molecule with applications in high open-circuit voltage organic solar cells

Rui Meira<sup>1</sup>, Pedro M. M. Costa<sup>2</sup>, Roberto E. Di Paolo<sup>2</sup>, Jorge Morgado<sup>1,3</sup>, Luís Alcácer<sup>1</sup>, João Bastos<sup>4</sup>, David Cheyns<sup>4</sup>, Ana Charas<sup>1\*</sup>

1 - Instituto de Telecomunicações, Instituto Superior Técnico, Av. Rovisco Pais 1, P-1049-001, Lisboa, Portugal

2 - Centro de Química Estrutural, Instituto Superior Técnico, Universidade de Lisboa, Av. Rovisco Pais, 1049-001, Lisboa, Portugal.

3 - Departamento de Bioengenharia, Instituto Superior Técnico, Universidade de Lisboa, Av. Rovisco Pais, P-1049-001, Lisbon, Portugal.

4 - IMEC, v.z.w., Kapeldreef 75, B-3001 Leuven, Belgium.

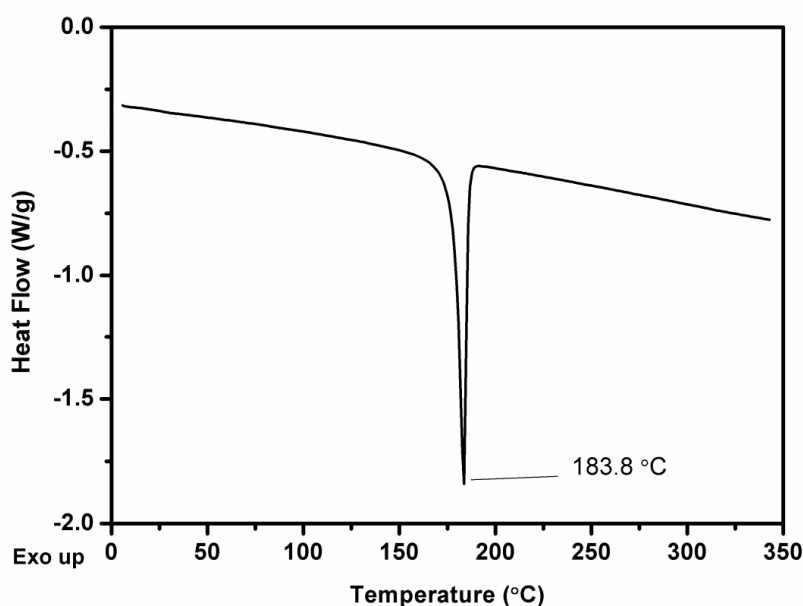

Figure S1. DSC thermogram of TPAPV measured at a heating rate of 10 °C/min under a nitrogen stream (2<sup>nd</sup> heating).

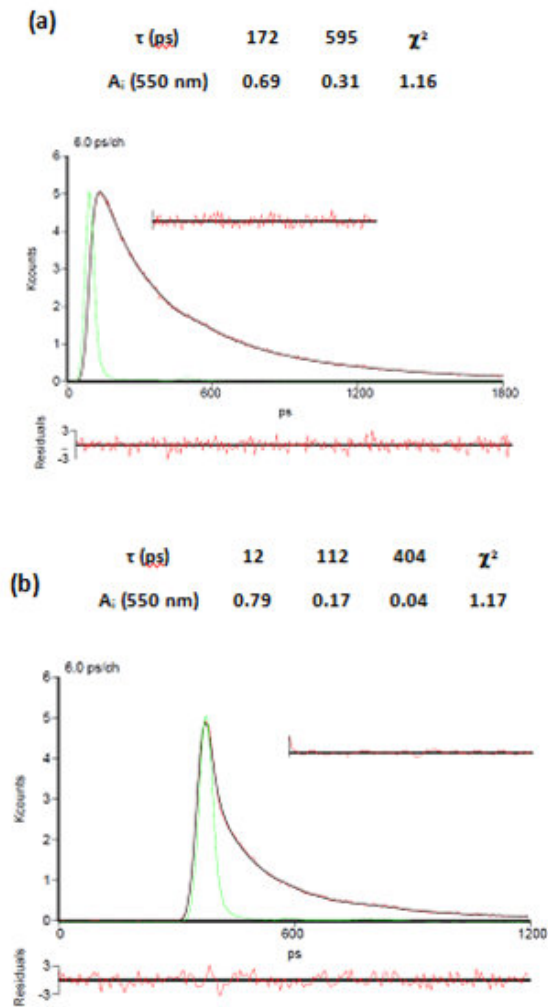

Figure S2. Fluorescence decays of TPAPV **(a)** in neat films and TPAPV:PC<sub>61</sub>BM blend films **(b)**. The decays were measured at 550 nm, upon excitation at 410 nm, with 6.1 ps/ch. The fits, weighted residuals (W.R.) and autocorrelation functions (A.C.) are also represented. The experimental excitation pulse is the narrowest one shown in green.

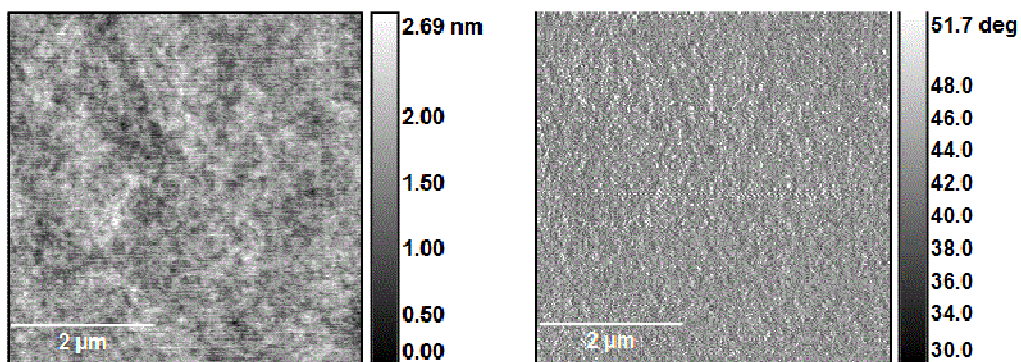

Figure S3. AFM topographic (left) and phase (right) images ( $5 \times 5 \mu\text{m}$ ) of TPAPV thermally evaporated on glass/ITO substrates. The  $R_{\text{rms}}$  is 0.31 nm.

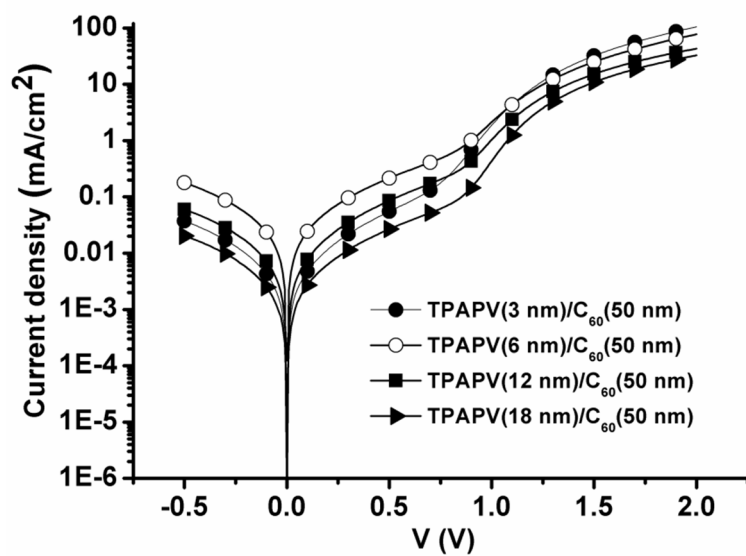

Figure S4.  $J$ - $V$  curves in a semilogarithmic representation for planar heterojunction PV cells fabricated with TPAPV/C<sub>60</sub>(50 nm) in the dark.
